# Supplementary material
Source: publisher figshare collection journal article supplement (https://tandf.figshare.com/ndownloader/files/14078336)
Supplement: Supplementary file 1 [file 14078336]

**NaN3 catalysed highly convenient access to functionalized 4*H*-chromenes: a green one-pot approach for diversity amplification**

Rathinam Ramesh,a Subramani Maheswari,a Jan Grzegorz Maleckib and Appaswami Lalitha*,a

*aDepartment of Chemistry, Periyar University, Salem-636011, Tamil Nadu, India*

*bDepartment of Crystallography, University of Silesia, Szkolna 9, 40-007 Katowice, Poland*

E-mail: lalitha2531@yahoo.co.in; Tel.: +91-427-234-5271; fax: +91-427-234-5124


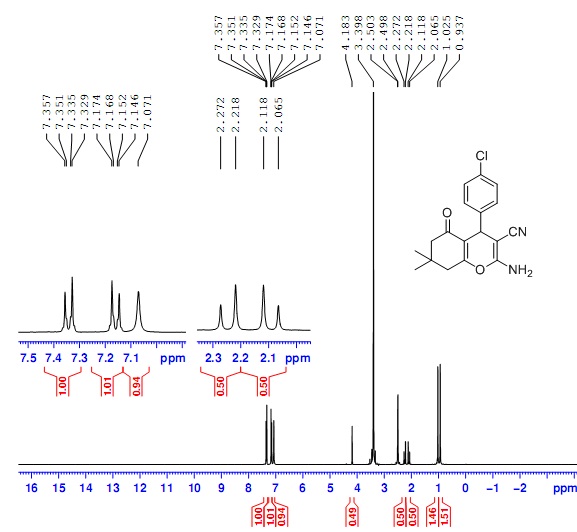


1H NMR Spectrum of compound **4b**


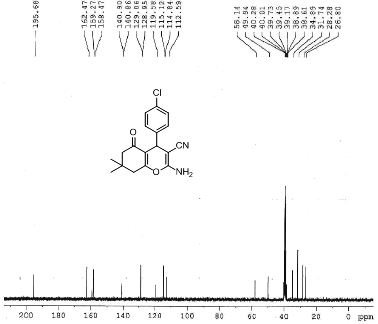


13C NMR Spectrum of compound **4b**


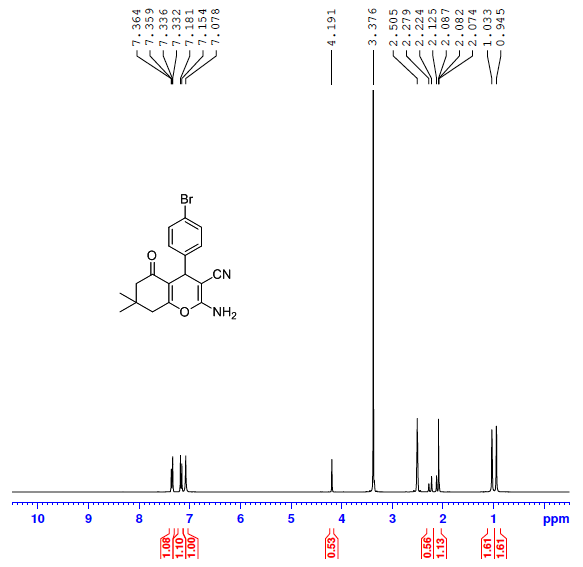


1H NMR Spectrum of compound **4c**


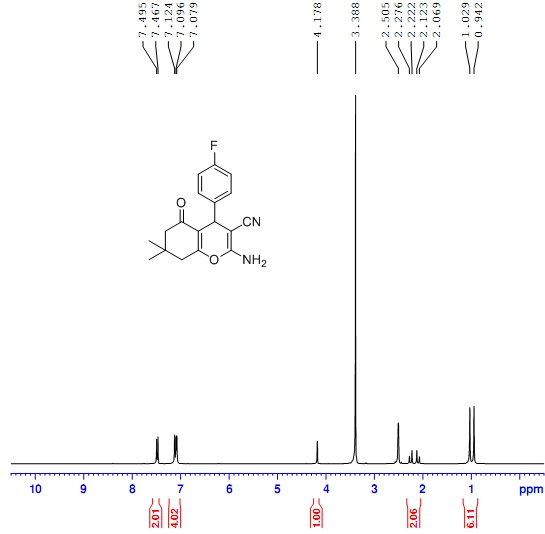


1H NMR Spectrum of compound **4d**

**
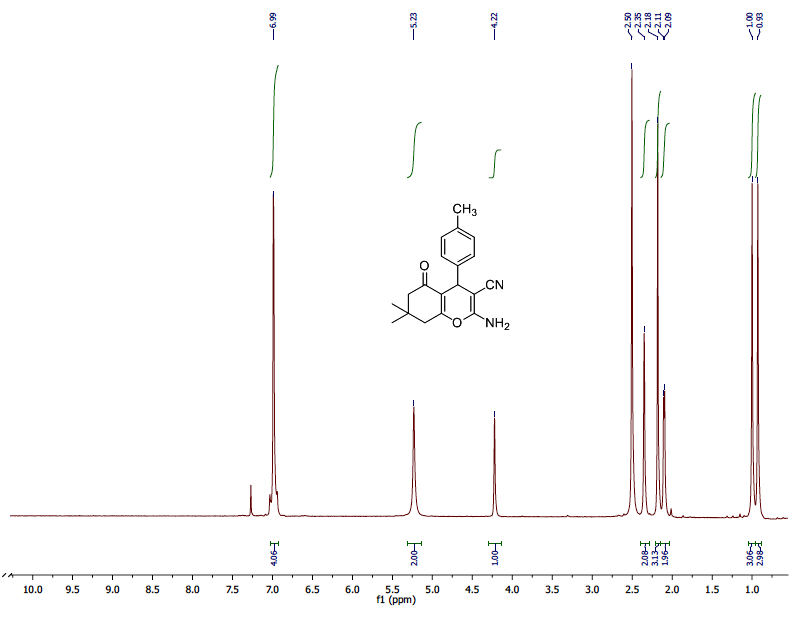
**

1H NMR Spectrum of compound **4e**

**
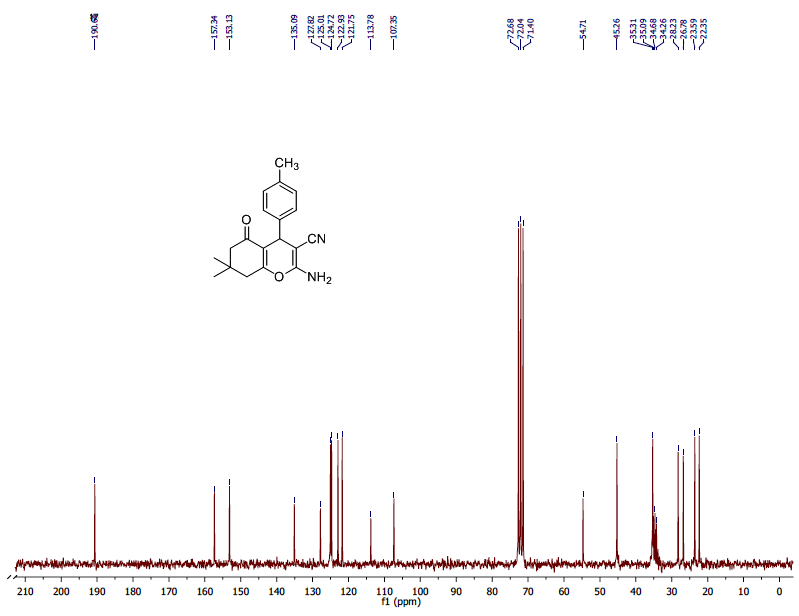
**

13C NMR Spectrum of compound **4e**


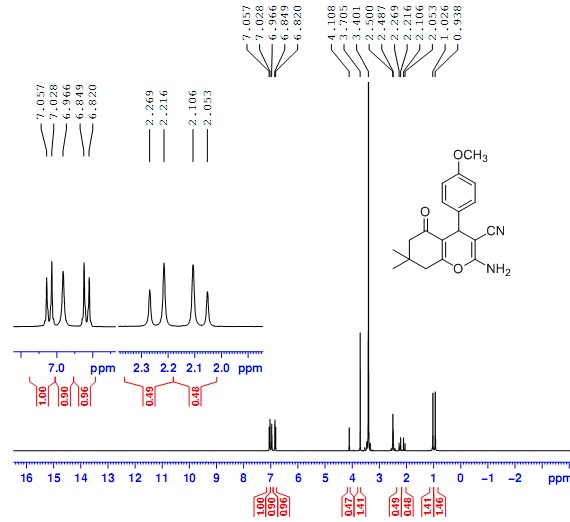


1H NMR Spectrum of compound **4f**


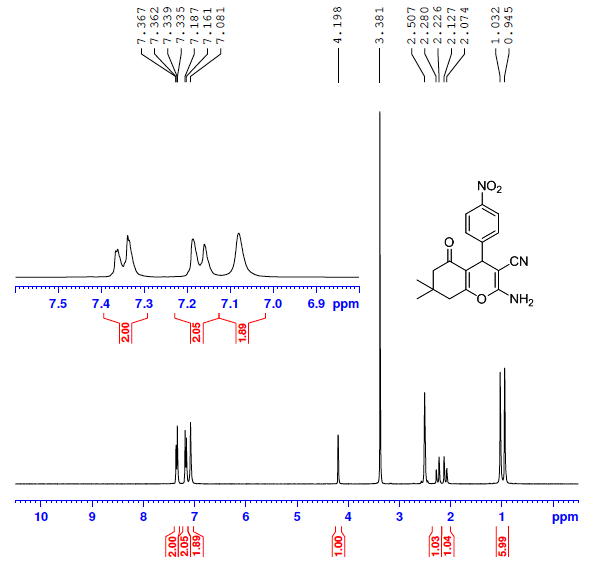


1H NMR Spectrum of compound **4g**


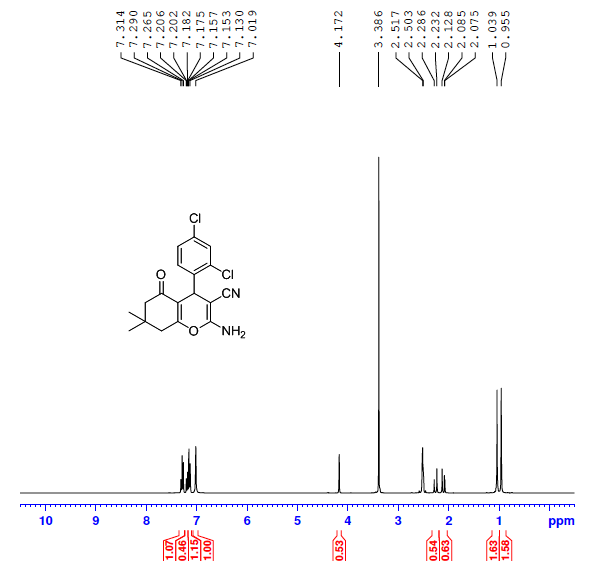


1H NMR Spectrum of compound **4k**

**
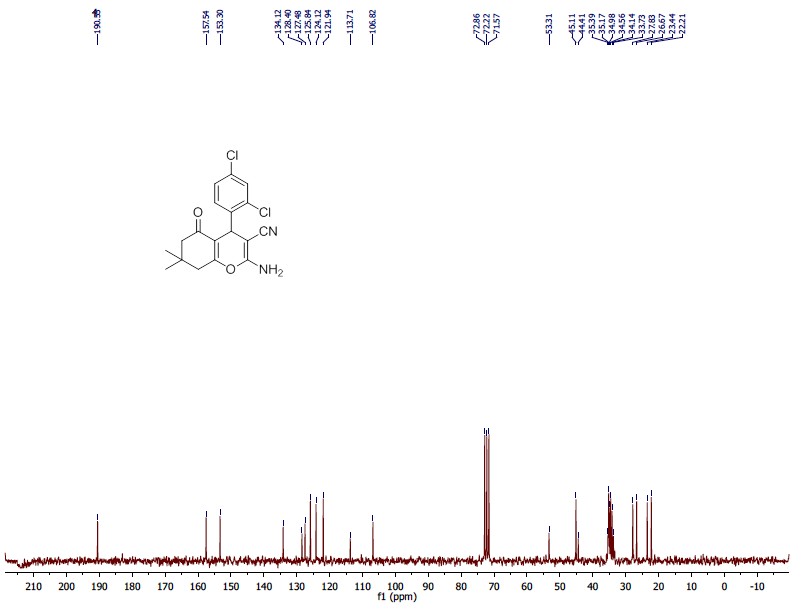
**

13C NMR Spectrum of compound **4k**


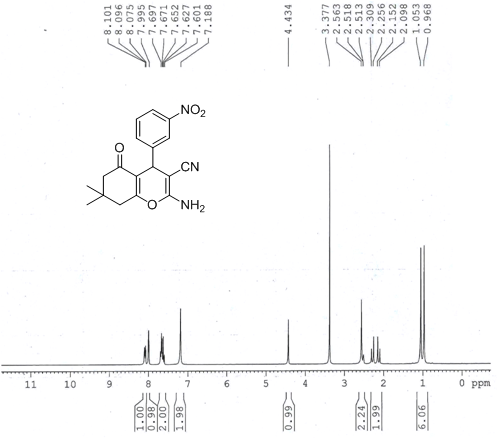


1H NMR Spectrum of compound **4m**


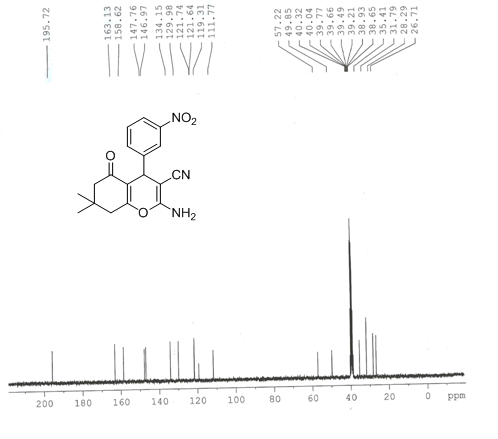


13C NMR Spectrum of compound **4m**


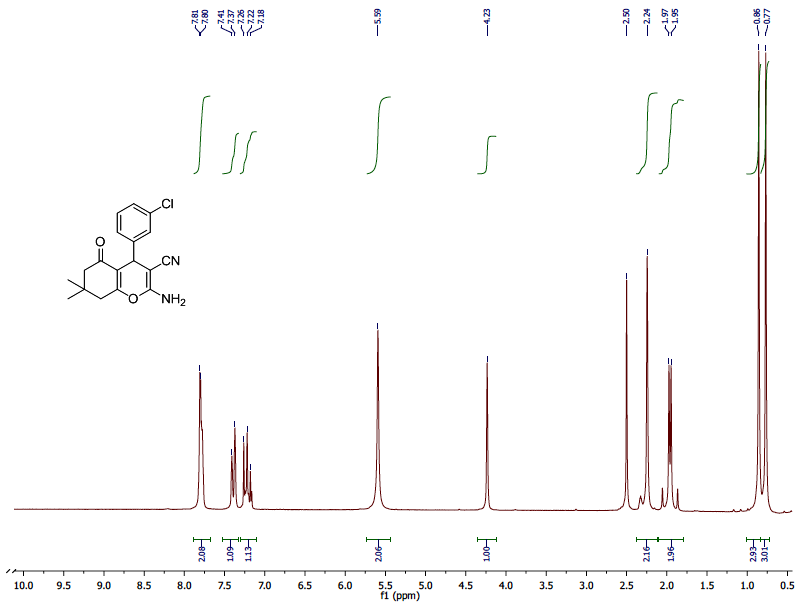


1H NMR Spectrum of compound **4n**


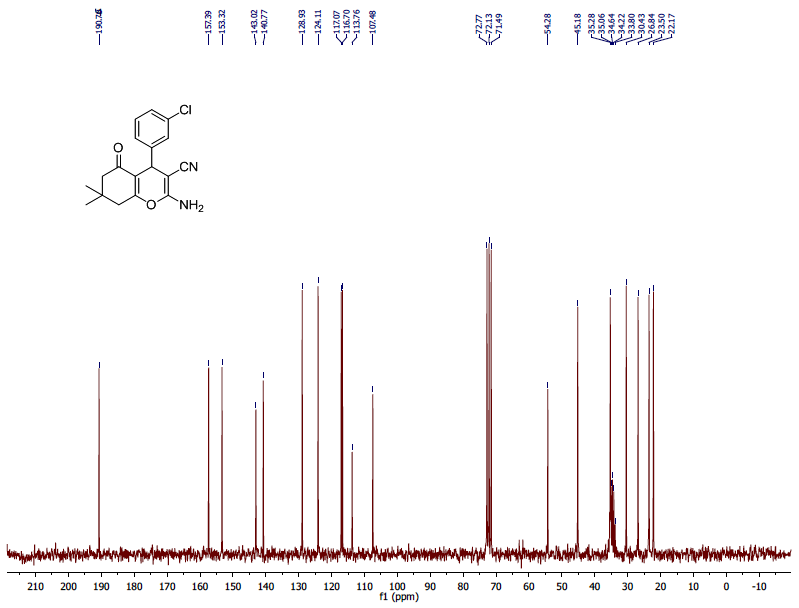


13C NMR Spectrum of compound **4n**

**
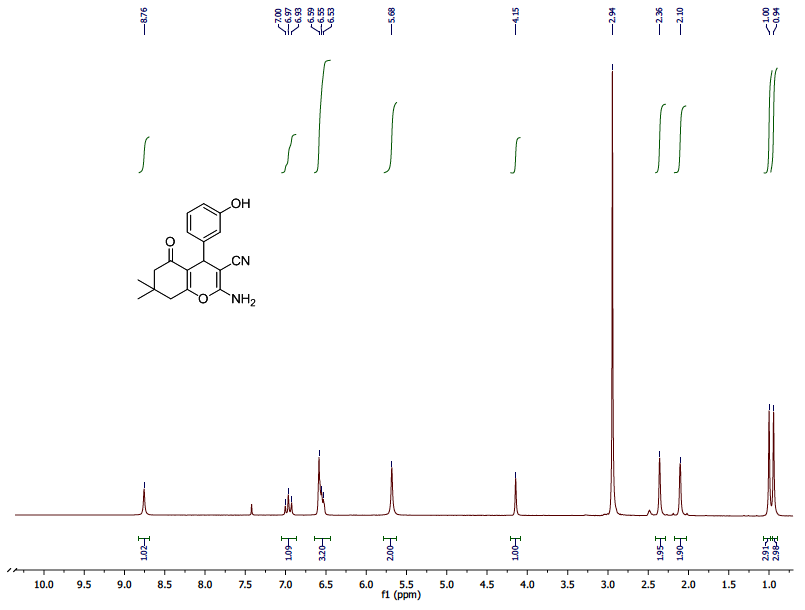
**

1H NMR Spectrum of compound **4o**

**
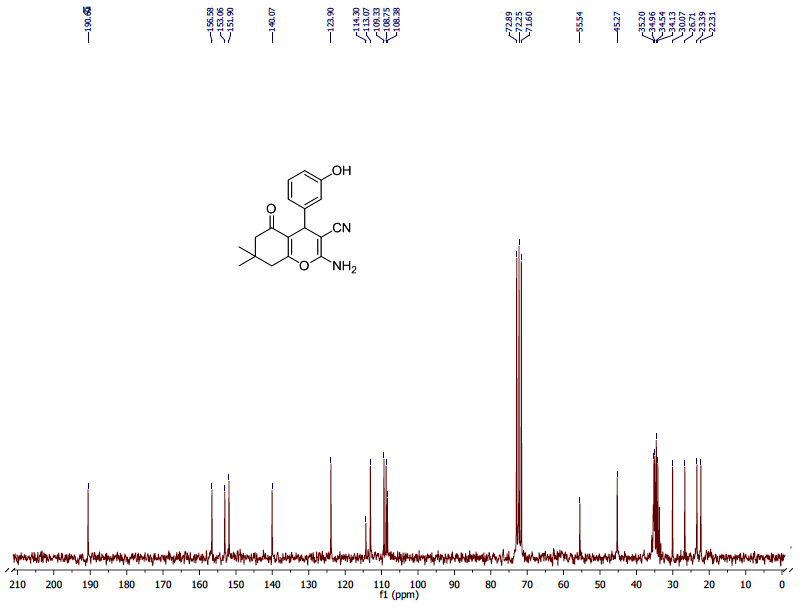
**

13C NMR Spectrum of compound **4o**


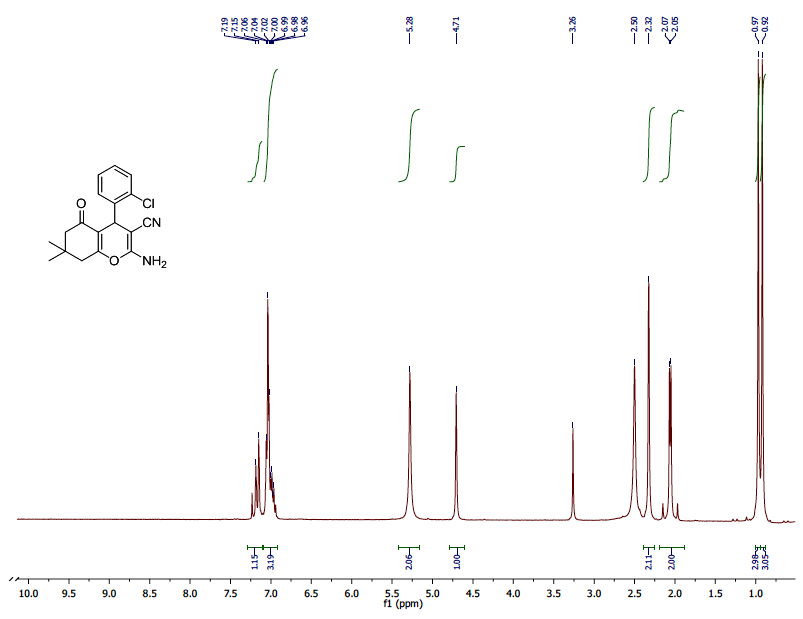


1H NMR Spectrum of compound **4p**


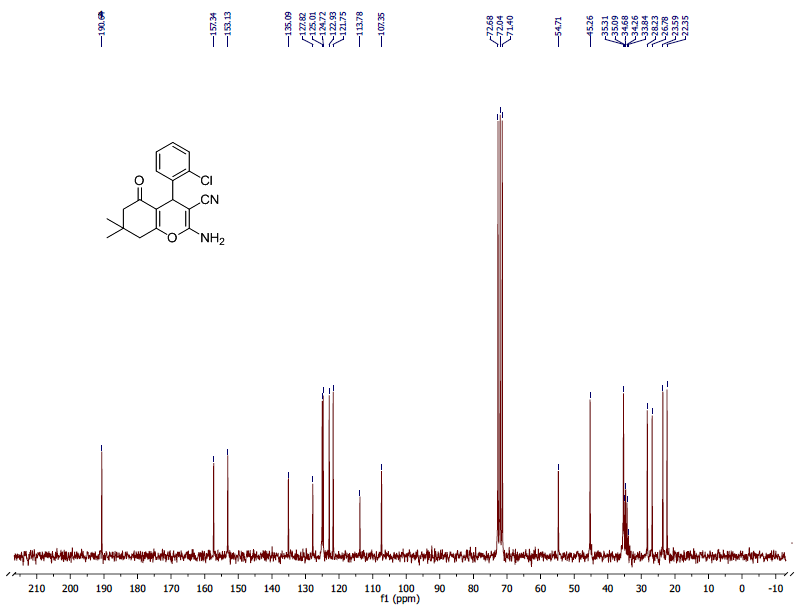


13C NMR Spectrum of compound **4p**


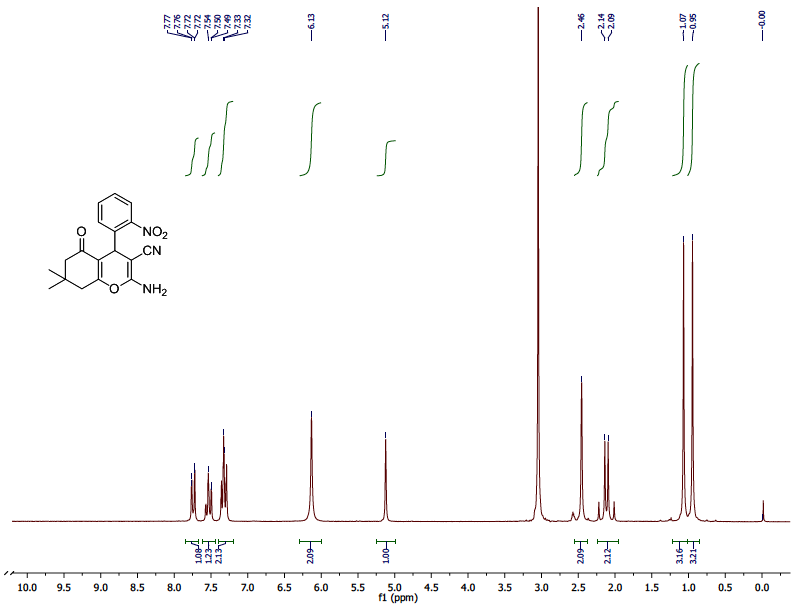


1H NMR Spectrum of compound **4q**


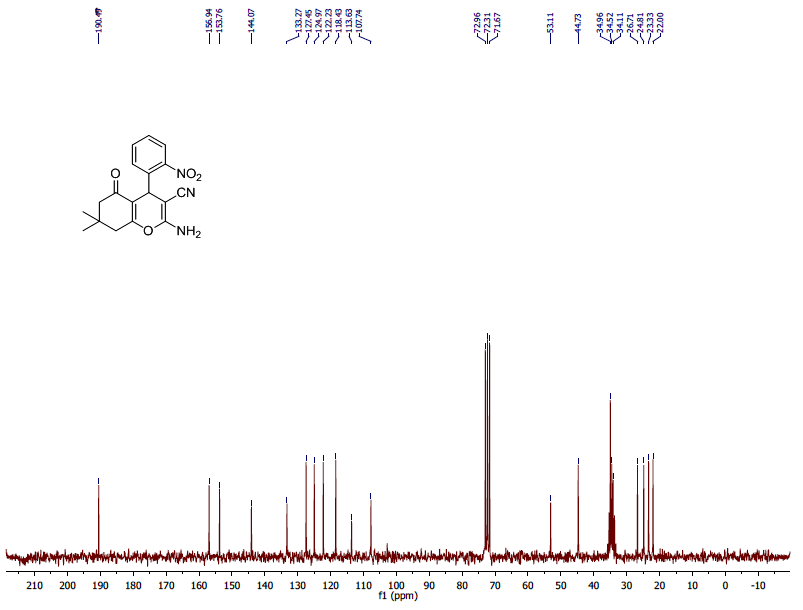


13C NMR Spectrum of compound **4q**


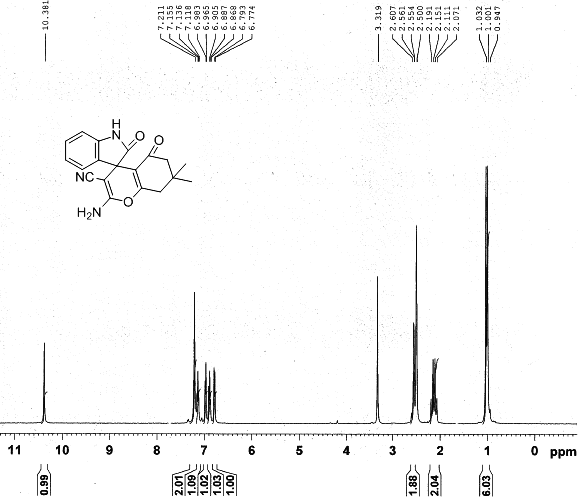


1H NMR Spectrum of compound **6**


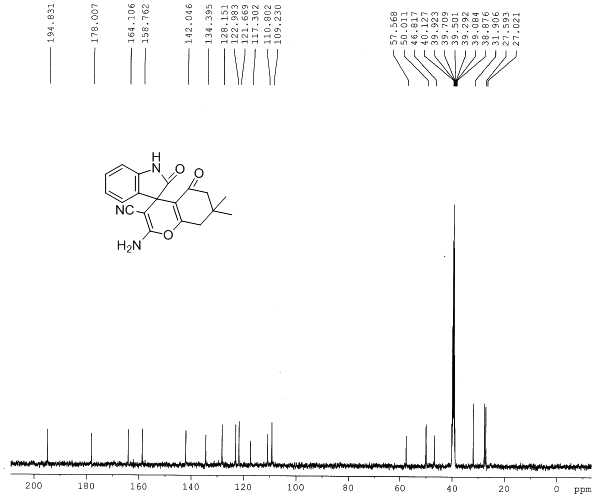


13C NMR Spectrum of compound **6**
